# Supplementary material for: CO2 capture in aqueous ammonia solutions: a computational chemistry perspective
Source: Royal Society of Chemistry journal article supplement (doi:10.1039/c2cp43459h), 2012-01-01
Supplement: c2cp43459h.pdf [file c2cp43459h.pdf]

1. Carbamate solvated by 1 water molecule

M06-2X/6-311++G(d,p)  $E_{\text{SCF}} = -321.040701$  hartree.

|   |     |             |             |             |
|---|-----|-------------|-------------|-------------|
| N | 7.0 | 2.05740905  | 0.00013275  | 0.02071070  |
| H | 1.0 | 2.43982768  | 0.84543186  | -0.37467769 |
| C | 6.0 | 0.62324739  | -0.00023693 | 0.01313861  |
| H | 1.0 | 2.44012332  | -0.84532505 | -0.37409377 |
| O | 8.0 | 0.08235429  | 1.12871850  | 0.02304819  |
| O | 8.0 | 0.08299372  | -1.12947249 | 0.02323774  |
| O | 8.0 | -2.50663280 | 0.00070147  | -0.02642109 |
| H | 1.0 | -1.86438811 | -0.72841096 | -0.00693690 |
| H | 1.0 | -1.86493504 | 0.73011392  | -0.00376190 |

2. Carbamate solvated by 2 water molecules

M06-2X/6-311++G(d,p)  $E_{\text{SCF}} = -397.493309$  hartree.

|   |     |             |             |             |
|---|-----|-------------|-------------|-------------|
| N | 7.0 | 2.39887857  | -0.33499125 | -0.10765085 |
| H | 1.0 | 2.84273791  | 0.02610544  | -0.93715084 |
| C | 6.0 | 1.04841220  | 0.08632393  | 0.02521560  |
| H | 1.0 | 2.51669979  | -1.32554471 | 0.03527818  |
| O | 8.0 | 0.74276429  | 1.15102983  | -0.55547094 |
| O | 8.0 | 0.31421304  | -0.64516854 | 0.73831016  |
| O | 8.0 | -2.08339500 | -1.49127018 | -0.52402526 |
| H | 1.0 | -1.20293355 | -1.43219876 | -0.11339898 |
| H | 1.0 | -2.36168051 | -0.56679547 | -0.49726605 |
| O | 8.0 | -1.81874788 | 1.28813255  | 0.44922239  |
| H | 1.0 | -1.44115245 | 0.65134877  | 1.07115424  |
| H | 1.0 | -1.01295495 | 1.46928346  | -0.07773089 |

3. Carbamate solvated by 3 water molecules

M06-2X/6-311++G(d,p)  $E_{\text{SCF}} = -473.943374$  hartree.

|   |     |             |             |             |
|---|-----|-------------|-------------|-------------|
| N | 7.0 | -1.57681036 | 1.36602604  | -0.18390667 |
| H | 1.0 | -2.31980371 | 0.87646204  | -0.66114289 |
| C | 6.0 | -0.44568011 | 0.59855449  | 0.13496609  |
| H | 1.0 | -1.36297607 | 2.29199457  | -0.51347154 |
| O | 8.0 | -0.61719203 | -0.65627873 | 0.19064246  |
| O | 8.0 | 0.61539000  | 1.21462762  | 0.37246665  |
| O | 8.0 | 2.96241331  | 0.42387420  | -1.05773580 |
| H | 1.0 | 2.18249941  | 0.89433479  | -0.72020489 |
| H | 1.0 | 2.90491366  | -0.40930495 | -0.57273513 |
| O | 8.0 | 1.91802287  | -1.26587725 | 1.12767196  |
| H | 1.0 | 1.87625432  | -0.32716334 | 1.35353589  |
| H | 1.0 | 1.02569377  | -1.36712515 | 0.74346733  |
| O | 8.0 | -3.08107424 | -1.32549548 | -0.54832971 |

|   |     |             |             |             |
|---|-----|-------------|-------------|-------------|
| H | 1.0 | -2.11899066 | -1.19786656 | -0.33945414 |
| H | 1.0 | -3.50077868 | -1.32989085 | 0.31375363  |
