# Supplementary material for: CO2 capture in aqueous ammonia solutions: a computational chemistry perspective
Source: Royal Society of Chemistry journal article supplement (doi:10.1039/c2cp43459h), 2012-01-01
Supplement: c2cp43459h_2.pdf [file c2cp43459h_2.pdf]

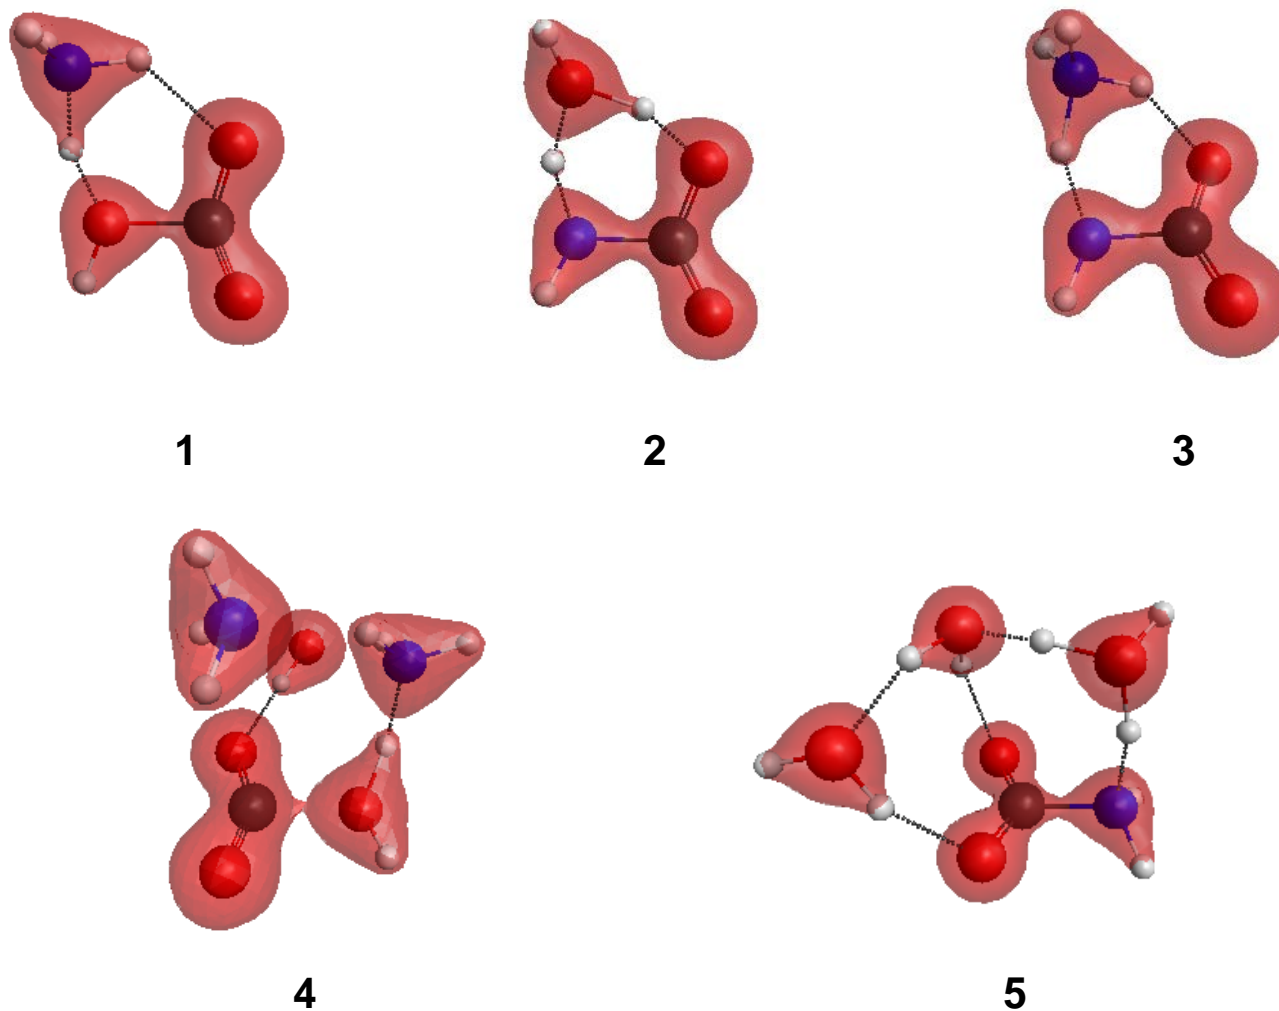

**Figure S1.** Electron pair density plots for selected TS's from LMO calculations. In some cases, the plots indicate N-CO<sub>2</sub> or O-CO<sub>2</sub> bond formation slightly precedes transfer of the proton to the acceptor e.g. 2,4,5 ; in other cases (1 and 3), it is almost simultaneous. In any case, the entire process is completed within one vibration.
